# Supplementary material for: Glyphosate, but not its metabolite AMPA, alters the honeybee gut microbiota
Source: PubMed Central journal article supplement (PMC6467416; doi:10.1371/journal.pone.0215466), 2019-04-16
Supplement: pone.0215466.s008.pdf [file pone.0215466.s008.pdf]

**S2 Table. Strains isolated from honeybee guts**

| Organism                                       | Isolated from | 16S sequence accession number | Phylum or class, order                      | Media allowing growth <sup>a</sup> | Growth under O <sub>2</sub> | Cell morphology                 |
|------------------------------------------------|---------------|-------------------------------|---------------------------------------------|------------------------------------|-----------------------------|---------------------------------|
| <i>Gilliamella apicola</i> strain IHP.2ste     | bee #2        | MH782109                      | $\gamma$ -proteobacteria, Orbales           | <u>HIB</u>                         | no                          | rod-shaped, Gram -              |
| <i>Snodgrassella alvi</i> strain IHP.IC1       | bee #5        | MH782110                      | $\beta$ -proteobacteria, Neisseriales       | <u>HIB</u> ,LB                     | no                          | rod-shaped, Gram -              |
| <i>Snodgrassella alvi</i> strain IHP.IO2       | bee #6        | MH782111                      |                                             |                                    |                             |                                 |
| <i>Bifidobacterium</i> sp. strain IHP.3T2CH    | bee #3        | MH782112                      | Actinobacteria, Bifidobacteriales           | <u>HIB</u> ,MRS                    | +                           | rod-shaped, Gram +              |
| <i>Bifidobacterium</i> sp. strain IHP.9OP      | bee #9        | MH782113                      |                                             |                                    |                             |                                 |
| <i>Bifidobacterium</i> sp. strain IHP.IC3      | bee #5        | MH782114                      |                                             |                                    |                             |                                 |
| <i>Lactobacillus kunkeei</i> strain IHP.7AA    | bee #7        | MH782115                      | Firmicutes, Lactobacillales                 | <u>HIB</u> , <u>MRS</u>            | ++                          | rod-shaped, Gram +              |
| <i>Lactobacillus kunkeei</i> strain IHP.B1     | bee #1        | MH782116                      |                                             |                                    |                             |                                 |
| <i>Lysinibacillus</i> sp. strain IHP.3T2B      | bee #3        | MH782117                      | Firmicutes, Bacillales                      | <u>HIB</u> ,MRS,LB                 | +++                         | rod-shaped, Gram + <sup>b</sup> |
| <i>Lysinibacillus</i> sp. strain IHP.4GCCB     | bee #4        | MH782118                      |                                             |                                    |                             |                                 |
| <i>Staphylococcus</i> sp. strain IHP.4GCCA     | bee #4        | MH782119                      | Firmicutes, Bacillales                      | <u>HIB</u> ,MRS,LB                 | +                           | cocci, Gram +                   |
| <i>Staphylococcus</i> sp. strain IHP.B3        | bee #1        | MH782120                      |                                             |                                    |                             |                                 |
| <i>Hafnia</i> sp. strain IHP.92DB <sup>c</sup> | bee #9        | MH782121                      | $\gamma$ -proteobacteria, Enterobacteriales | <u>HIB</u> , <u>MRS</u> ,LB        | +++                         | rod-shape, Gram -               |

<sup>a</sup> Medium with the best growth is underlined. HIB: Heart Infusion Broth. MRS: De Man, Rogosa and Sharpe (here supplemented with fructose and cystein). LB: Lysogeny Broth

<sup>b</sup> Strains forming big bacilli with central Gram positive coloration but lighter ends

<sup>c</sup> Colonies grown on agar media had a "flowery" smell
